# Supplementary material for: ARCHI – Entwicklung eines Fragebogens zur Architektur kinder- und jugendpsychiatrischer Einrichtungen
Source: Atypon-hosted journal article supplement (doi:10.1024/1422-4917/a000838), 2021-11-09
Supplement: 1422-4917_a000838_esm1.pdf [file 1422-4917_a000838_esm1.pdf]

**ESM 1. Liste der untersuchten architektonischen Aspekte (Ergebnis der Literaturrecherche)**

|                       |                                                                                                                                                                                                                                                                                                                                                         |
|-----------------------|---------------------------------------------------------------------------------------------------------------------------------------------------------------------------------------------------------------------------------------------------------------------------------------------------------------------------------------------------------|
| <b>Fenster</b>        | <ol style="list-style-type: none"> <li>1. Viel Glas vs. Wenig Glas</li> <li>2. Fenstergröße</li> <li>3. Fensterausrichtung</li> <li>4. Sonnenlichteinfall</li> <li>5. Aussicht</li> </ol>                                                                                                                                                               |
| <b>Zimmer</b>         | <ol style="list-style-type: none"> <li>6. Raumform/ Grundriss</li> <li>7. Farbgestaltung: Wand, Boden</li> <li>8. Möblierung</li> <li>9. Kunst</li> <li>10. Dekoration</li> <li>11. Technische Ausstattung</li> <li>12. Individuell einstellbares Licht</li> <li>13. (individuell einstellbare) Belüftung</li> </ol>                                    |
| <b>Station</b>        | <ol style="list-style-type: none"> <li>14. Offene vs. Geschlossene Türen</li> <li>15. Stationsform</li> <li>16. Stationsgröße</li> <li>17. Zugang zur Natur</li> <li>18. Pflanzen</li> <li>19. Dimensionierung der Umwelt</li> <li>20. Aufenthaltsräume</li> </ol>                                                                                      |
| <b>Ganzes Gebäude</b> | <ol style="list-style-type: none"> <li>21. Orientierung</li> <li>22. Sauberkeit</li> <li>23. Lärm</li> <li>24. Lage</li> <li>25. Viel Platz</li> <li>26. Räume für soziale Interaktion</li> <li>27. Bewegungsräume</li> <li>28. Besuchsbereiche</li> <li>29. Ausrichtung des Gebäudes</li> <li>30. Außenbereiche</li> <li>31. Therapiegarten</li> </ol> |
