# Supplementary material for: ARCHI – Entwicklung eines Fragebogens zur Architektur kinder- und jugendpsychiatrischer Einrichtungen
Source: Atypon-hosted journal article supplement (doi:10.1024/1422-4917/a000838), 2021-11-09
Supplement: 1422-4917_a000838_esm2.pdf [file 1422-4917_a000838_esm2.pdf]

## ESM 2. Exemplarische Ergebnisse und Auswertung aller Fragen der Expertise-Befragung

| Online Expertise-Befragung                                                                                             | Originalantworten                                                                                                                                                                                                                                                                   | Mayring'sche Kategorisierung |
|------------------------------------------------------------------------------------------------------------------------|-------------------------------------------------------------------------------------------------------------------------------------------------------------------------------------------------------------------------------------------------------------------------------------|------------------------------|
| <b>1. Welche drei Merkmale fallen Ihnen spontan ein, wenn Sie an eine ideale Kinder- und Jugendpsychiatrie denken?</b> | „Familienorientierung“, „Miteinbezug des gesamten Familiensystems“                                                                                                                                                                                                                  | Miteinbezug der Familie      |
|                                                                                                                        | „wohnlich“, „gemütlich“, „hell“, „freundlich einladend“                                                                                                                                                                                                                             | Raum-Atmosphäre              |
|                                                                                                                        | „viel Raum“, „viel Indoor-Platz für Bewegungsaktivitäten“                                                                                                                                                                                                                           | Größe der Innenräume         |
|                                                                                                                        | „viel (Außen-)Fläche“, „Möglichkeit, im Außenbereich zu spielen und zu toben“                                                                                                                                                                                                       | Außenbereich                 |
|                                                                                                                        | „Kinderkrankenhaus“, „altersgerecht“, „kindgerecht“                                                                                                                                                                                                                                 | Angemessene Umgebung         |
|                                                                                                                        | „kinder- und jugendgerechte Farben und Materialien“                                                                                                                                                                                                                                 | Materialien                  |
|                                                                                                                        | „Schutzraum“, „Rückzug“, „sicheres, geborgenes Umfeld“                                                                                                                                                                                                                              | Rückzug & Geborgenheit       |
| <b>2.a) Welche Eigenschaften eines Klinikgebäudes sind Ihrer Einschätzung nach besonders relevant?</b>                 | „Größe auf der Basis einer ansprechenden Architektur“, „viel Platz“                                                                                                                                                                                                                 | Platz                        |
|                                                                                                                        | „Rückzug und Ruhe“, „Rückzugsbereiche für das Personal“                                                                                                                                                                                                                             | Rückzugsmöglichkeiten        |
|                                                                                                                        | „kind- und jugendgerechte Innengestaltung“, „Räume, insbesondere öffentlich zugängliche Räume sollten dazu einladen, dass Kinder und Jugendliche sich darin gerne aufhalten und entfalten“                                                                                          | Räume                        |
| <b>3) Welche Eigenschaften des Außenbereiches sind Ihrer Einschätzung nach besonders relevant?</b>                     | „ausreichend geschützt“, „Einfache und sichere Nutzung von Außenanlagen für Sport und Spiel sollen möglich sein“, „Sicherheit“                                                                                                                                                      | Sicherheitskonzept           |
|                                                                                                                        | „Möglichkeiten für Spaziergänge in der Natur“, „Einbezug der umgebenden Natur nicht nur in Form von Spielplätzen sondern auch als Gestaltungsraum für therapeutisch/ päd. pflegerische Interventionen“                                                                              | Naturbezug                   |
| <b>4. Wie könnte ein idealer Grundriss einer idealen KJP aussehen?</b>                                                 | „viel Platz“, „viel Fläche“, „ausreichend Platz“, „groß“                                                                                                                                                                                                                            | Großflächigkeit              |
| <b>5.a) Welche Aspekte sollten bei der Planung einer Station für Kinder besonders berücksichtigt werden?</b>           | „Partizipation von Kindern/Jugendlichen und ihren Familien“, „Unterbringungsmöglichkeiten für eine ganze Familie, wenn es keine eigene Eltern-Kind-Station gibt“, „separater Elternbereich“, „große Räume für Multifamilientherapie“, „Räume für Elternbesuche und -übernachtungen“ | Familienorientierung         |

| Online Expertise-Befragung                                                                                                             | Originalantworten                                                                                                                                                                                                  | Mayring'sche Kategorisierung               |
|----------------------------------------------------------------------------------------------------------------------------------------|--------------------------------------------------------------------------------------------------------------------------------------------------------------------------------------------------------------------|--------------------------------------------|
|                                                                                                                                        | „einen ausreichend großen Flurbereich, der auch bespielt werden darf (und nicht irgendwelchen Brandschutzaufgaben entsprechend kahl bleiben muss.)“, „ausreichend helle, große Räume“                              | Architektonische Eigenschaften der Station |
|                                                                                                                                        | „Snoezelenraum“, „Rückzugsmöglichkeiten“, „Angstreduzierender Time-Out- Raum“, „keine Time-Out- Räume“                                                                                                             | Ruhezonen                                  |
| <b>5.b) Welche Aspekte sollten bei der Planung einer Station für Jugendliche besonders berücksichtigt werden?</b>                      | „Rückzugsbedarf“, „kein Time-Out sondern Ruheraum“, „Möglichkeiten für Rückzug und Ruhe“, „Chillecken“                                                                                                             | Rückzugsmöglichkeiten                      |
|                                                                                                                                        | „Gemeinschaftsküche“, „Raum für gemeinsame Freizeitgestaltung“, „Möglichkeiten, sich im künstlerischen und praktischen Bereich auszuprobieren“, „Räume für jugendspezifische Aktivitäten“                          | Partizipation                              |
|                                                                                                                                        | Suizidprävention                                                                                                                                                                                                   | Suizidprävention                           |
| <b>6. Wie könnte es dem Pflegepersonal erleichtert werden, die Station, sowie die Gemeinschafts- und Wohnräume gut zu überblicken?</b> | „stabile Glaswände“, „große Glasflächen, die Sicht in andere Räume, z.B. Aufenthaltsräume ermöglichen“, „die Erleichterung wäre sicher durch große offene Fensterflächen, Glaswände oder Videoüberwachung optimal“ | Nutzung von transparenten Materialien      |
|                                                                                                                                        | „Stationszimmer in der Mitte“, „offene Pflegezentrale mit angrenzendem Raum“, Von einem Glaskasten sternförmig ausgehende Wohn- und Gemeinschaftsräume“                                                            | Zentral gelegener Stützpunkt               |
|                                                                                                                                        | „keine Ecken“, „keine abknickenden Flure“, „Station L-Förmig angelegt, sodass keine langen Flure entstehen“                                                                                                        | Grundriss der Station                      |
| <b>7. Was könnte den Patient*innen helfen, sich sowohl auf Station, als auch im gesamten Klinikgebäude zu orientieren?</b>             | „Farbleitsysteme“, „unterschiedliche Farbpaletten für einzelne Bereiche“, „Farbmarkierung.“                                                                                                                        | Farbkonzepte                               |
|                                                                                                                                        | „ansprechende, kindgemäße Wegweiser“, „klare und logische Wegeführung mit entsprechender Beschilderung in Kinderstation“                                                                                           | Beschilderung                              |
|                                                                                                                                        | „Symbole an Wänden“, „farblich und durch einfache Symbole gekennzeichnete und dadurch unterscheidbare Bereiche“                                                                                                    | Symbole                                    |
|                                                                                                                                        | „Fußböden“, „farbige Linien am Boden“, „manche Kliniken arbeiten mit Klebern auf dem Boden, z.B. Echsen in unterschiedlichen Farben“                                                                               | Fußbodenbeschriftung                       |

| Online Expertise-Befragung                                                                                                                                                                      | Originalantworten                                                                                                                                                                                                                                                 | Mayring'sche Kategorisierung                         |
|-------------------------------------------------------------------------------------------------------------------------------------------------------------------------------------------------|-------------------------------------------------------------------------------------------------------------------------------------------------------------------------------------------------------------------------------------------------------------------|------------------------------------------------------|
| <b>8. Wie sollten die Schlaf- und Sozialbereiche den Therapiebereichen zueinander angeordnet sein?</b>                                                                                          | <p>„eher getrennt voneinander“,<br/>„Therapiebereiche sollten hinreichenden räumlichen Abstand haben, damit Außenalltag und Innenweltarbeit sich im Erleben der Patienten nicht zu sehr vermischen.“</p>                                                          | <p>Gründe für eine möglichst entfernte Anordnung</p> |
|                                                                                                                                                                                                 | <p>„beisammen, dadurch bessere Beaufsichtigung möglich“, „die Frage impliziert, dass es eine klare Trennung geben sollte, wobei diese Zimmer m.E. auch nebeneinander liegen können, damit die Therapeuten auch möglichst viel vom Stationsalltag mitbekommen“</p> | <p>Gründe für eine möglichst nahe Anordnung</p>      |
| <b>9. Inwiefern sollten sich Räume mit unterschiedlichen Funktionen auch farblich voneinander unterscheiden?</b>                                                                                | <p>„das erleichtert die Orientierung“,<br/>„stationsinterne Markierung“</p>                                                                                                                                                                                       | <p>Orientierung durch Farbkonzepte</p>               |
|                                                                                                                                                                                                 | <p>„Schlaf-, Patientenräume eher warme bzw. Pastelltöne“, „Gerne unterschiedliche Farbtöne, die unterschiedliche Sinneswahrnehmungen erzeugen“</p>                                                                                                                | <p>therapeutische Nutzung</p>                        |
| <b>10. Wie sollte eine Kinder- und Jugendpsychiatrische Station im Idealfall eingerichtet sein? Was ist beim Einsatz von Möbeln und Dekorativen Elementen zu beachten? (Blumen, Kunst etc.)</b> | <p>„Sicherheit“, „dekorative Elemente können zu ‚Wurfgeschossen‘ werden, daher eher leichte Ausführung“, „zur Selbstschädigung“</p>                                                                                                                               | <p>Sicherheitsaspekt</p>                             |
|                                                                                                                                                                                                 | <p>„Sauberkeit“, „robuste, schwer entflammbare, gut zu reinigende Möbel, die trotzdem gemütlich aussehen.“</p>                                                                                                                                                    | <p>Hygiene</p>                                       |
|                                                                                                                                                                                                 | <p>„ausreichende langlebige Blumen“, „Verschönerung der Gemeinschaftsräume durch Blumen sollte regelmäßig unter Einbeziehung der Patienten gepflegt werden“, „gerne einige Pflanzen“</p>                                                                          | <p>Pflanzen</p>                                      |
|                                                                                                                                                                                                 | <p>„künstlerische Objekte“, „gerne Kunst von Patienten für Patienten“, „Kunst gerne - aber nicht nur zur Selbstdarstellung der Erwachsenen“</p>                                                                                                                   | <p>Kunst</p>                                         |
|                                                                                                                                                                                                 | <p>„viel selbst gestaltet/wechselnd“, „Dekoration soll sich verändern. Patienten sollten an dieser Veränderung selbstwirksam partizipieren“, „Anonyme Abschiedsgrüße ehemaliger Patienten an der Wand“</p>                                                        | <p>Partizipation/Individuelle Gestaltung</p>         |
| <b>11. Welche Materialien sollten aus atmosphärischer Sicht zur Inneneinrichtung genutzt werden?</b>                                                                                            | <p>„muss gut zu reinigen sein, z.B. wenn Skabies auf Station auftritt.“, „die Materialien müssen auch mit Gebrauchsspuren noch ansehnlich bleiben“, „helle Materialien“</p>                                                                                       | <p>Eigenschaften des Materials</p>                   |
|                                                                                                                                                                                                 | <p>„spezifische stabile Kunststoffe zur Ergänzung“</p>                                                                                                                                                                                                            | <p>Synthetische Materialien</p>                      |

| Online Expertise-Befragung                                                                                                                                 | Originalantworten                                                                                                                                                                                                                                                                                                                                                                                                                       | Mayring'sche Kategorisierung               |
|------------------------------------------------------------------------------------------------------------------------------------------------------------|-----------------------------------------------------------------------------------------------------------------------------------------------------------------------------------------------------------------------------------------------------------------------------------------------------------------------------------------------------------------------------------------------------------------------------------------|--------------------------------------------|
|                                                                                                                                                            | „Glas“, „viel Glas, um den Blick nach draußen zu ermöglichen“                                                                                                                                                                                                                                                                                                                                                                           | Transparente Materialien                   |
|                                                                                                                                                            | „Holz“, „viel Holz mit lebendiger Struktur und Maserung“, „Kork“, „Ergänzende Naturmaterialien“                                                                                                                                                                                                                                                                                                                                         | Naturmaterialien                           |
| <b>12. Sollten die Patient*innen die Möglichkeit besitzen, die Möblierung der Patient*innen-Zimmer individuell mitzugestalten?</b>                         | „Unbedingt, wenn Neumöblierung ansteht. Das kann man dann weitererzählen.“, „sie sollten bei der Erstausrüstung partizipieren können“                                                                                                                                                                                                                                                                                                   | Partizipation bei der Erstausrüstung       |
|                                                                                                                                                            | „nein, aber schon ein Teil der Wände“, „Leisten zum Anbringen persönlicher Bilder“, „selbstverständlich Wände zum Anbringen von Fotos, Postern etc.“                                                                                                                                                                                                                                                                                    | Individuelle Wandgestaltung                |
|                                                                                                                                                            | „es sollten in den Patientenzimmern Möglichkeiten bestehen, persönliche Gegenstände einzubringen“, „Patienten und Patientinnen sollten zudem eingeladen werden, persönliche Accessoires von Zuhause mitzubringen, um sich einzurichten.“                                                                                                                                                                                                | Gestaltung durch persönliche Gegenstände   |
|                                                                                                                                                            | „das wäre nicht schlecht, durch einfache modulhafte Möblierung, die man gut umstellen kann.“                                                                                                                                                                                                                                                                                                                                            | Individuell gestaltbare Modulmöblierung    |
| <b>13. Was ist (ohne rechtliche Vorgabe) die optimale Quadratmeteranzahl pro Kopf und wie viele Patient*innen sollten in einem Zimmer versorgt werden?</b> | „es sollte 1- und 2-Bett-Zimmer geben.“, „möglichst nur 2er Zimmer zur Förderung dyadischer Bezogenheit & zum Schutz einzelner vor sozialem Ausschluss im Drei- oder Viereck“                                                                                                                                                                                                                                                           | 1-2-Bettzimmer als optimale Zimmerbelegung |
|                                                                                                                                                            | „ca. 8- 10 m2/ Pat“ über „15 m2 / Pat.“, bis hin zu „ab 20 m2“                                                                                                                                                                                                                                                                                                                                                                          | Quadratmeteranzahl pro Kopf                |
| <b>14. Sollte jedes Patient*innen-Zimmer einen direkten Zugang zum Außengelände haben?</b>                                                                 | „nein, das wäre absolut lebenswelt-fremd“, „nein“, „nein“, „nein“, „nein; Gefahr, dass dies missbraucht wird - Drogen einschleusen - kann erhöht sein“                                                                                                                                                                                                                                                                                  |                                            |
| <b>15. Gibt es Merkmale, die Ihrer Erfahrung nach nennenswert sind, die von uns jedoch nicht angesprochen wurden. Wenn ja, welche?</b>                     | „Schallschutzfragen“, wie kann man Wohnlichkeit mit z.B. Vorhängen oder Alternativen gestalten ohne dass es zulasten Hygiene (60° waschbar), Brandschutz (schwer entflammbar), Sicherheit (Suizidversuche) geht?“, „Ruhe/Time-out-Räume, direkt neben dem Stationszimmer zum Ankommen von ängstlichen Pat. und zur Beobachtung (Tür in der Regel immer offen, freundliche "Komm-Struktur")“, „Gestaltung der Sanitärbereiche (Bulimie)“ |                                            |
