# Supplementary material for: ARCHI – Entwicklung eines Fragebogens zur Architektur kinder- und jugendpsychiatrischer Einrichtungen
Source: Atypon-hosted journal article supplement (doi:10.1024/1422-4917/a000838), 2021-11-09
Supplement: 1422-4917_a000838_esm3.pdf [file 1422-4917_a000838_esm3.pdf]

**ESM 3. Vollständiger Fragebogen**

**ARCHI**

**Ein Fragebogen (ARCHI) zur Evaluation der therapeutischen Relevanz von architektonischen Aspekten in Kliniken bzw. Versorgungseinrichtungen für Kinder- und Jugendpsychiatrie, Psychosomatik und Psychotherapie für im System therapeutisch arbeitende Personen**

| <b>Angaben zu der Klinik, in der Sie tätig sind</b> Bitte kreuzen Sie in jeder Zeile, für Sie zutreffendes an |     |     |
|---------------------------------------------------------------------------------------------------------------|-----|-----|
| Anzahl der stationären Plätze                                                                                 | <40 | >40 |

|                                                    | ja | nein |
|----------------------------------------------------|----|------|
| Universitäre Abteilung/ Uniklinik                  |    |      |
| Klinik in Trägerschaft des Landes                  |    |      |
| Kommunale Klinik                                   |    |      |
| Kirchliche Trägerschaft                            |    |      |
| Beliehenes Haus/Teilnahme an der Pflichtversorgung |    |      |
| Stationäre Plätze zur Rehabilitationsbehandlung    |    |      |
| Teilstationäre Plätze                              |    |      |

|            |  |
|------------|--|
| Bundesland |  |
|------------|--|

**1. Welche Relevanz haben folgende Faktoren für die Qualität des therapeutischen Prozesses einer kinder- & jugendpsychiatrischen Behandlung?**  
Bitte kreuzen Sie in jeder Zeile eine Antwortoption an.

|                                             | nicht relevant | relevant | in vollem Umfang relevant |
|---------------------------------------------|----------------|----------|---------------------------|
| Therapeutisches Arbeiten der Mitarbeitenden |                |          |                           |
| Digitale Ausstattung                        |                |          |                           |
| Möblierung der Räume                        |                |          |                           |
| Architektur (inneres und äußeres Design)    |                |          |                           |

**2. Auf welche Faktoren der kinder- und jugendpsychiatrischen Behandlung hat Architektur einen relevanten Einfluss?**  
Bitte kreuzen Sie in jeder Zeile eine Antwortoption an.

|  | nicht relevant | relevant | in vollem Umfang relevant |
|--|----------------|----------|---------------------------|
|  |                |          |                           |

|                                                               |  |  |  |
|---------------------------------------------------------------|--|--|--|
| die Qualität der therapeutischen Arbeit der Mitarbeitenden    |  |  |  |
| Beziehungsförderung zwischen Patient*innen                    |  |  |  |
| Beziehungsförderung zwischen Patient*innen und Mitarbeitenden |  |  |  |
| Kreativität & Spiel der Patient*innen                         |  |  |  |
| Geborgenheit & Schutz                                         |  |  |  |
| das Gefühl, willkommen zu sein                                |  |  |  |
| Aktivierung & Bewegung                                        |  |  |  |

### 3. Welche Relevanz sollten folgenden Faktoren für die Wahl eines Klinikstandortes haben?

Bitte kreuzen Sie in jeder Zeile eine Antwortoption an.

|                                             | nicht relevant | relevant | in vollem Umfang relevant |
|---------------------------------------------|----------------|----------|---------------------------|
| Anbindung an andere klinische Einrichtungen |                |          |                           |
| urbane Umgebung                             |                |          |                           |
| ländliche Umgebung                          |                |          |                           |
| Erreichbarkeit im ÖPNV                      |                |          |                           |

**4. Welche Relevanz schreiben Sie folgenden Eigenschaften eines Klinikgebäudes zu?**

Bitte kreuzen Sie in jeder Zeile eine Antwortoption an.

|                                                                            | nicht relevant | relevant | in vollem Umfang relevant |
|----------------------------------------------------------------------------|----------------|----------|---------------------------|
| Licht                                                                      |                |          |                           |
| Farbgestaltung                                                             |                |          |                           |
| funktionale Arbeitsbereiche zur Unterstützung reibungsloser Arbeitsabläufe |                |          |                           |
| Gebäudehöhe (Anzahl der Etagen)                                            |                |          |                           |
| Akustische Eigenschaften der Räume                                         |                |          |                           |
| Orientierungsmöglichkeiten bei der Bewegung im Gebäude                     |                |          |                           |
| Größe der Räume                                                            |                |          |                           |

**5. Welchen therapeutischen Nutzen schreiben Sie den folgenden äußeren Formkonzepten der Gebäudestruktur der Klinik zu?**

Bitte kreuzen Sie in jeder Zeile eine Antwortoption an.

|                                            | nicht relevant | relevant | in vollem Umfang relevant |
|--------------------------------------------|----------------|----------|---------------------------|
| Aufteilung der Räume in separate Pavillons |                |          |                           |
| L-Form                                     |                |          |                           |
| U-Form                                     |                |          |                           |
| ovale oder elliptische Form                |                |          |                           |
| E-Form                                     |                |          |                           |
| Sternform                                  |                |          |                           |
| Atrium                                     |                |          |                           |

**6.a Welche Relevanz schreiben Sie folgenden Aspekten einer kinderpsychiatrischen Station zu?**

Bitte kreuzen Sie in jeder Zeile eine Antwortoption an.

|                                                                                               | nicht relevant | relevant | in vollem Umfang relevant |
|-----------------------------------------------------------------------------------------------|----------------|----------|---------------------------|
| Familienorientierung (z.B. Familienaufenthaltsräume, familienorientiertes Behandlungskonzept) |                |          |                           |
| Bewegungsförderung                                                                            |                |          |                           |
| Unfallverhütung                                                                               |                |          |                           |
| Kindgerechte Raumgestaltung                                                                   |                |          |                           |

**6.b Wie sind die genannten Aspekte, Ihrer Meinung nach, zu priorisieren?**

Bitte ordnen Sie jedem der genannten Faktoren eine Priorität zu, wobei 1 der höchsten und 4 der niedrigsten Priorität entspricht. Jede Priorität kann nur einmal angegeben werden.

|                                                                                               | 1 | 2 | 3 | 4 |
|-----------------------------------------------------------------------------------------------|---|---|---|---|
| Familienorientierung (z.B. Familienaufenthaltsräume, familienorientiertes Behandlungskonzept) |   |   |   |   |

|                             |  |  |  |  |
|-----------------------------|--|--|--|--|
| Bewegungsförderung          |  |  |  |  |
| Unfallverhütung             |  |  |  |  |
| Kindgerechte Raumgestaltung |  |  |  |  |

**7.a Welche Relevanz schreiben Sie folgenden Aspekten einer jugendpsychiatrischen Station zu?**

Bitte kreuzen Sie in jeder Zeile eine Antwortoption an.

|                                          | nicht relevant | relevant | in vollem Umfang relevant |
|------------------------------------------|----------------|----------|---------------------------|
| Raum für jugendspezifische Aktivitäten   |                |          |                           |
| Suizidprävention                         |                |          |                           |
| Gemeinschaftsküche                       |                |          |                           |
| Aufenthaltsmöglichkeiten im Außenbereich |                |          |                           |

**7.b Wie sind die genannten Aspekte, Ihrer Meinung nach, zu priorisieren?**

Bitte ordnen Sie jedem der genannten Faktoren eine Priorität zu, wobei 1 der höchsten und 4 der niedrigsten Priorität entspricht. Jede Priorität kann nur einmal angegeben werden.

|                                          | 1 | 2 | 3 | 4 |
|------------------------------------------|---|---|---|---|
| Raum für jugendspezifische Aktivitäten   |   |   |   |   |
| Suizidprävention                         |   |   |   |   |
| Gemeinschaftsküche                       |   |   |   |   |
| Aufenthaltsmöglichkeiten im Außenbereich |   |   |   |   |

**8. Welche Relevanz haben die folgenden architektonischen Möglichkeiten, die Familie in die Therapie miteinzubeziehen?**

Bitte kreuzen Sie in jeder Zeile eine Antwortoption an.

|                                         | nicht relevant | relevant | in vollem Umfang relevant |
|-----------------------------------------|----------------|----------|---------------------------|
| Separate Aufenthaltsbereiche für Eltern |                |          |                           |
| Räume für Elternbesuche                 |                |          |                           |
| Schlafräume für Elternübernachtungen    |                |          |                           |
| Räume für Familientherapie              |                |          |                           |

**9. Welche Relevanz haben folgende Faktoren für die Patient\*innenüberwachung auf einer Station?**

Bitte kreuzen Sie in jeder Zeile eine Antwortoption an.

|                                                                 | nicht relevant | relevant | in vollem Umfang relevant |
|-----------------------------------------------------------------|----------------|----------|---------------------------|
| Transparente Materialien (z.B. Glas, Plastik, Plexiglas)        |                |          |                           |
| zentraler Stützpunkt (mittig gelegen, Flure sind gut einsehbar) |                |          |                           |
| Grundriss der Station (z.B. panoptisch, strahlenförmig)         |                |          |                           |

**10. Welche Relevanz spielt die Anordnung der Therapieräume zu den Sozialräumen der Station und Patientenzimmern, in Bezug auf das therapeutische Arbeiten?**

Bitte kreuzen Sie in jeder Zeile eine Antwortoption an.

|                        | nicht relevant | relevant | in vollem Umfang relevant |
|------------------------|----------------|----------|---------------------------|
| Räumlich nahe Distanz  |                |          |                           |
| Räumlich ferne Distanz |                |          |                           |

**11. Welche Relevanz haben folgende Möglichkeiten, die Patient\*innen in die Gestaltung der Patientenzimmer miteinzubeziehen?**

Bitte kreuzen Sie in jeder Zeile eine Antwortoption an.

|                                                                | nicht relevant | relevant | in vollem Umfang relevant |
|----------------------------------------------------------------|----------------|----------|---------------------------|
| Modulmöblierung, die individuell zusammengestellt werden kann  |                |          |                           |
| Wandgestaltung z.B. durch Bilder oder Poster                   |                |          |                           |
| Einbezug persönlicher Gegenstände in die Gestaltung des Raumes |                |          |                           |

**12. Welche der folgenden Aspekte in der Dekoration & Inneneinrichtung sind aus therapeutischer Sicht relevant?**

Bitte kreuzen Sie in jeder Zeile eine Antwortoption an.

|                                                                                  | nicht relevant | relevant | in vollem Umfang relevant |
|----------------------------------------------------------------------------------|----------------|----------|---------------------------|
| Blumen und Pflanzen                                                              |                |          |                           |
| im therapeutischen Alltag durch Patienten und Patientinnen gestaltete Dekoration |                |          |                           |
| Sichtbare Sauberkeit                                                             |                |          |                           |
| Naturmotive als Wanddekoration                                                   |                |          |                           |

**13. Welche folgenden Aspekte können den Patient\*innen helfen, sich sowohl auf Station als im Gebäude orientierend zurecht zu finden?**

Bitte kreuzen Sie in jeder Zeile eine Antwortoption an.

|                                                                                    | nicht relevant | relevant | in vollem Umfang relevant |
|------------------------------------------------------------------------------------|----------------|----------|---------------------------|
| Bodenbeschriftung (Pfeile zeigen, wo es lang geht)                                 |                |          |                           |
| Beschilderung im Allgemeinen                                                       |                |          |                           |
| Symbole & Piktogramme (bildlich vereinfachte Kennzeichnung der einzelnen Bereiche) |                |          |                           |
| Farbcodierung (Bereiche sind farblich voneinander zu unterscheiden)                |                |          |                           |

**14. Wie relevant sind folgende Gründe, die für die Unterbringung im Mehrbettzimmer sprechen?**

Bitte kreuzen Sie in jeder Zeile eine Antwortoption an.

|                                | nicht relevant | relevant | in vollem Umfang relevant |
|--------------------------------|----------------|----------|---------------------------|
| Wirtschaftlichkeit             |                |          |                           |
| Suizidprävention               |                |          |                           |
| Förderung sozialer Beziehungen |                |          |                           |

**15. Wie relevant sind folgende Gründe, die für die Unterbringung im Einzelzimmer sprechen?**

Bitte kreuzen Sie in jeder Zeile eine Antwortoption an.

|                                                   | nicht relevant | relevant | in vollem Umfang relevant |
|---------------------------------------------------|----------------|----------|---------------------------|
| Privatsphäre (z.B. für Rückzug und Intimität)     |                |          |                           |
| Schutz vor sozialer Überreizung                   |                |          |                           |
| individuelle Gestaltung des Patient*innen-Zimmers |                |          |                           |

**16. Welche Relevanz schreiben Sie folgenden Materialien zur Stationsgestaltung zu?**

Bitte kreuzen Sie in jeder Zeile eine Antwortoption an.

|                                            | nicht relevant | relevant | in vollem Umfang relevant |
|--------------------------------------------|----------------|----------|---------------------------|
| organische Materialien (Holz, Kork etc.)   |                |          |                           |
| transparente Materialien (Glas, Plexiglas) |                |          |                           |
| synthetische Stoffe (Textil, Kunststoff)   |                |          |                           |

**17. Welche Relevanz haben folgende Faktoren der Gestaltung des Außenbereiches?**

Bitte kreuzen Sie in jeder Zeile eine Antwortoption an.

|                                                                          | nicht relevant | relevant | in vollem Umfang relevant |
|--------------------------------------------------------------------------|----------------|----------|---------------------------|
| Einbindung von Natur (z.B. durch Bäume, Pflanzen, Grünflächen)           |                |          |                           |
| Größe (z.B. Platz für Bewegung bei gegebener Übersichtlichkeit)          |                |          |                           |
| Kinder- und Jugendschutzmaßnahmen                                        |                |          |                           |
| Zugänglichkeit des Außenbereiches (von verschiedenen Orten des Gebäudes) |                |          |                           |

**18. Ist es wichtig, dass jedes Patient\*innen-Zimmer einen direkten Zugang zum Außengelände besitzt?**

Bitte kreuzen Sie die, Ihrer Meinung nach, am ehesten zutreffende Antwortoption an.

ja

nein

**19. Was wären aus Ihrer Sicht gute Möglichkeiten, um Räume und Gebäude vor Vandalismus zu schützen?**

Hier können Sie ihre Antwort frei formulieren. Bitte verwenden Sie nach Möglichkeit Blockschrift.

**20.a Wie bemessen Sie den aktuellen architektonischen Zustand Ihrer Klinik bezogen auf Ihr therapeutisches Arbeiten?**

Hier können Sie ihre Antwort frei formulieren. Bitte verwenden Sie nach Möglichkeit Blockschrift.

**20.b Welche architektonischen Eigenschaften ihrer Klinik erleben Sie im Alltag als unterstützend für Ihr therapeutisches Arbeiten?**

Hier können Sie ihre Antwort frei formulieren. Bitte verwenden Sie nach Möglichkeit Blockschrift.

**20.c Welche architektonischen Eigenschaften ihrer Klinik erleben sie im Alltag als hinderlich für Ihr therapeutisches Arbeiten?**

Hier können Sie ihre Antwort frei formulieren. Bitte verwenden Sie nach Möglichkeit Blockschrift.

**20.d Was schätzen Sie an der Klinikarchitektur der Klinik, in der Sie tätig sind, besonders?**

Hier können Sie ihre Antwort frei formulieren. Bitte verwenden Sie nach Möglichkeit Blockschrift.
